# Supplementary material
Source: ML conference proceedings conference paper supplement (https://openreview.net/forum?id=c7sI8S-YIS_)
Supplement: supplementary_material [file attachment]

## A Training details

We trained 24 networks of each of the three types. The versions differed in the size of the neighborhood (4, 8, 12, or 20 neighbors), the amount of noise added ( $\alpha \in 0, 0.1, 0.2$ ), and the used loss (position or factor loss).

The parameters we trained were:

- all weights of the underlying network
- the logit transform of  $p$  for each relative position of two neighbors
- the logarithms of the diagonal entries of  $C$  for each relative position of neighbors

We trained models using the standard stochastic gradient descent implemented in pytorch [56] with a learning rate of 0.001, a momentum of 0.9 and a slight weight decay of 0.0001. To speed up convergence we increased the learning rate by a factor of 10 for the parameters of the prediction, i.e.  $C$  and  $p$ . For the gradient accumulation for the position based loss, we accumulate 5 repetitions for the pixel model and 10 for the linear model and for predseg1. Each repetition contained 10 random negative locations. Batch size was set to fit onto the smaller GPU type used in our local cluster. The resulting sizes are listed in Table 2.

### A.1 Architecture details

The pixel model was implemented as a single Identity layer.

The linear model was implemented as a single  $50 \times 11 \times 11$  convolutional layer.

The Predseg1 model was implemented as a sequential model with 4 processing steps separated by subsampling layers ( $1 \times 1$  convolutional layers with a stride  $> 1$ ). The first processing step was a  $3 \times 3$  convolutional layer with 3 channels followed by subsampling by a factor of 3. The second step was a  $11 \times 11$  convolutional layer with 64 features followed by subsampling by a factor of 2. The third and fourth steps were residual processing blocks, i.e. two convolutional layers with a rectified linear unit non-linearity between them whose results were added to the inputs. They had 128 and 256 features respectively and were separated by another subsampling by a factor of 2.

### A.2 Added noise

To prevent individual features dimensions from becoming perfectly predictive, we added a small amount of Gaussian noise to the feature maps before applying the loss. To yield variables with mean 0 and variance 1 after adding the noise we implemented this step as:

$$f_{noise} = \sqrt{1 - \alpha^2} + \alpha\epsilon \quad (13)$$

where  $\alpha \in [0, 1]$  controls the noise variance and  $\epsilon$  is a standard normal random variable.

Adding this noise did not change any of our results substantially and the three versions with different amounts of noise ( $\alpha = 0, 0.1$  or  $0.2$ ) performed within 1 – 2% in all performance metrics.

### A.3 Training duration

Networks were trained in training jobs that were limited to either 48 hours of computation time or 10 epochs of training. As listed in table 2 we used a single such job for the pixel models, 7 for the linear models and 9 for the predseg1 models. Most larger networks were limited by the 48 hour limit, not by the epoch limit.

### A.4 Used computational resources

The vast majority of the computation time was used for training the network parameters. Computing segmentations for the BSDS500 images and evaluating them took only a few hours of pure CPU processing.

Table 2: Training parameters and training time for the different networks. Networks were trained on single V100 (32GB) or RTX8000 (48GB) GPUs depending on availability. Training times were approximately read out from the computation logs. # of training jobs indicates how many 48 hour jobs we started for each model.

| Model                    | batch size | training time (hh:mm per epoch) |       |       |       | # training jobs |
|--------------------------|------------|---------------------------------|-------|-------|-------|-----------------|
|                          |            | 4                               | 8     | 12    | 20    |                 |
| pixel (position loss)    | 32         | 0:30                            | 1:00  | 1:30  | 2:30  | 1               |
| pixel (factor loss)      | 32         | 0:45                            | 1:20  | 2:00  | 3:15  | 1               |
| linear (position loss)   | 6          | 10:20                           | 20:20 | 30:15 | 50:00 | 7               |
| linear (factor loss)     | 6          | 4:00                            | 7:50  | 11:30 | 19:00 | 7               |
| predseg1 (position loss) | 16         | 4:05                            | 7:45  | 11:25 | 18:40 | 9               |
| predseg1 (factor loss)   | 24         | 2:20                            | 4:40  | 6:45  | 11:10 | 9               |

560 Networks were trained on an internal cluster using one GPU at a time and 6 CPUs for data loading.  
561 We list the training time per epoch in table 2. If every job had run for the full 48 hours we would have  
562 used  $(1 + 7 + 9) \times 24 \times 2 = 816$  days of GPU processing time, which is a relatively close upper  
563 bound on the time we actually used.
